# Supplementary material for: Efficient photocatalytic hybrid Ag/TiO2 nanodot arrays integrated into nanopatterned block copolymer thin films
Source: Royal Society of Chemistry journal article supplement (doi:10.1039/b9nj00245f), 2009-01-01
Supplement: b9nj00245f.pdf [file b9nj00245f.pdf]

## Supporting Information

### Efficient Photocatalytic Hybrid Ag/TiO<sub>2</sub> Nanodot Arrays Integrated into Nanopatterned Block Copolymer Thin Films

Dinakaran Kannaiyan,<sup>a</sup> Min-Ah Cha,<sup>a</sup> Yoon Hee Jang,<sup>a</sup> Byeong-Hyeok Sohn,<sup>b</sup> June Huh,<sup>c</sup> Cheolmin Park,<sup>c</sup> and Dong Ha Kim\*<sup>a</sup>

<sup>a</sup> Department of Chemistry and Nano Science, Ewha Womans University, 11-1 Daehyun-Dong, Seodaemun-Gu, Seoul 120-750, Korea. Fax: +82-2-3277-4517; Tel: +82-2-3277-3419; E-mail: dhkim@ewha.ac.kr

<sup>b</sup> Department of Chemistry, NANO Systems Institute, Seoul National University, Seoul 151-747, Korea

<sup>c</sup> Department of Materials Science and Engineering, Yonsei University, Seoul, 120-749, Korea

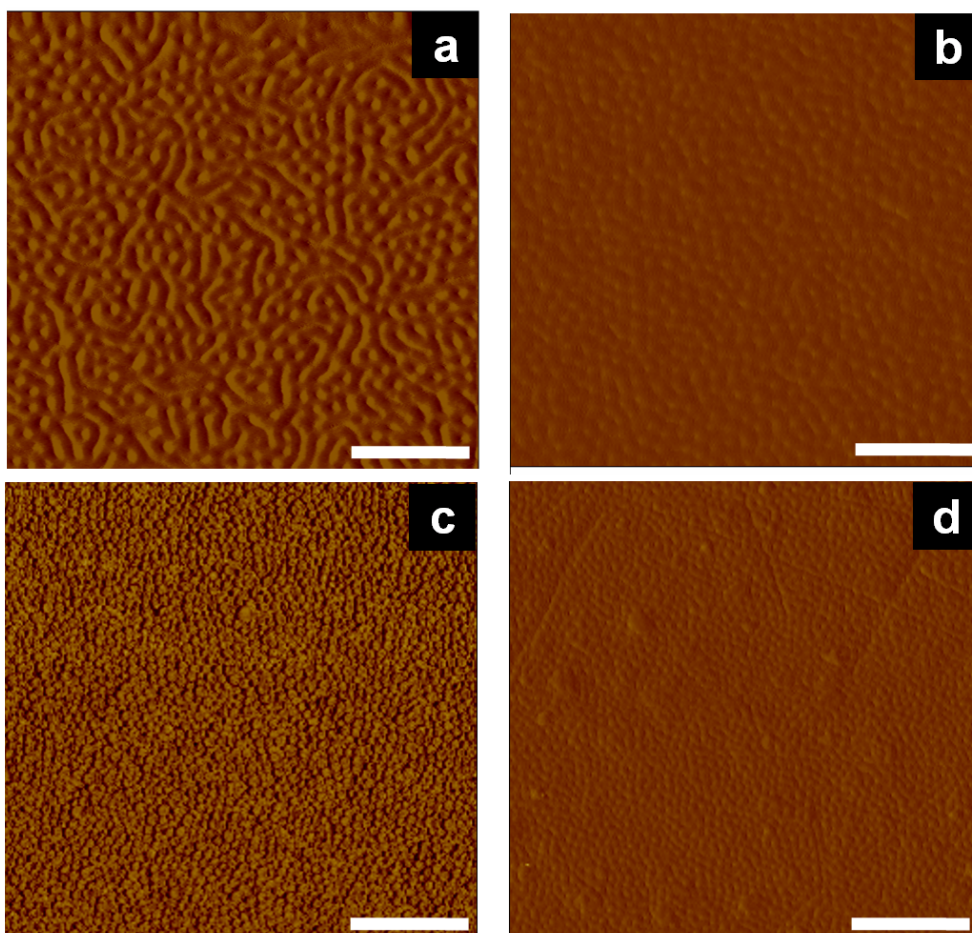

Figure S1. Phase contrast AFM images of hybrid PS-*b*-PEO/TiO<sub>2</sub>/Ag thin films spin coated on silicon wafers: (a) PS-*b*-PEO/TiO<sub>2</sub>, (b) PS-*b*-PEO /TiO<sub>2</sub>/Ag<sub>2</sub>, (c) PS-*b*-PEO /TiO<sub>2</sub>/Ag<sub>2</sub> after UV irradiation for 24 hours, (d) PS-*b*-PEO /TiO<sub>2</sub>/Ag<sub>6</sub> and (e) PS-*b*-PEO /TiO<sub>2</sub>/Ag<sub>10</sub>,

A fixed amount of 10 volume percentage of  $\text{TiO}_2$  with respect to BCP was added in all the samples. The suffix 2, 6 and 10 following Ag represents molar ratio of Ag to EO as presented in Table 1.

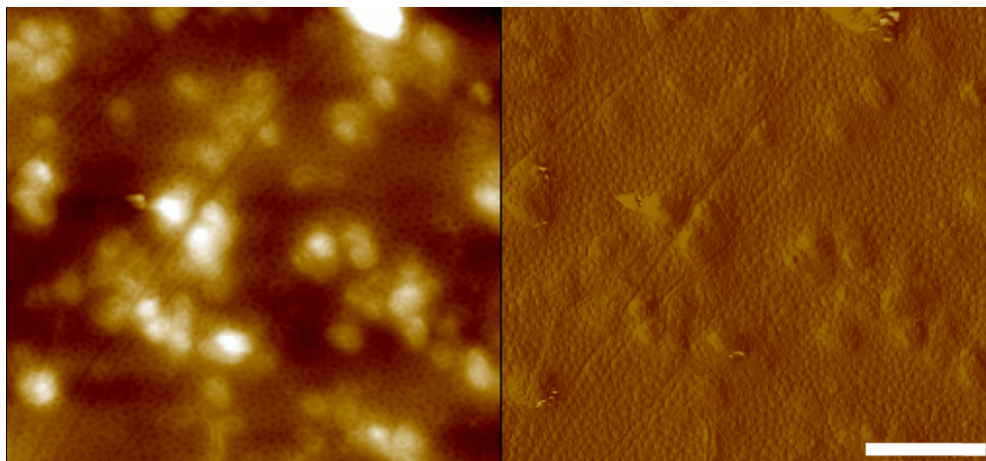

Figure S2. Height and Phase contrast AFM images of hybrid PS-*b*-PEO / $\text{TiO}_2$ /Ag10,  
A fixed amount of 10 volume percentage of  $\text{TiO}_2$  with respect to BCP was added in all the  
samples. The suffix 10 following Ag represents molar ratio of Ag to EO as presented in Table  
1
